# Supplementary material
Source: PubMed Central journal article supplement (PMC2844456)

**2669**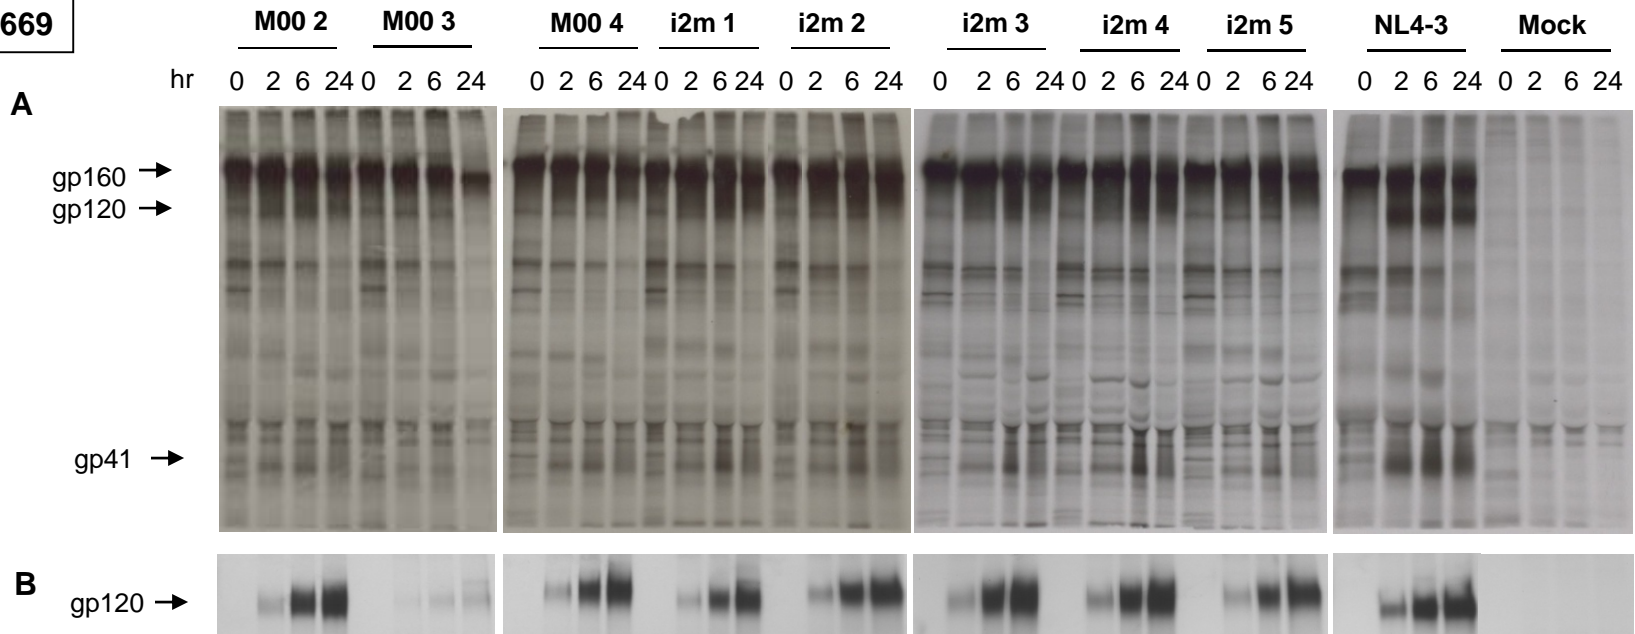**1449**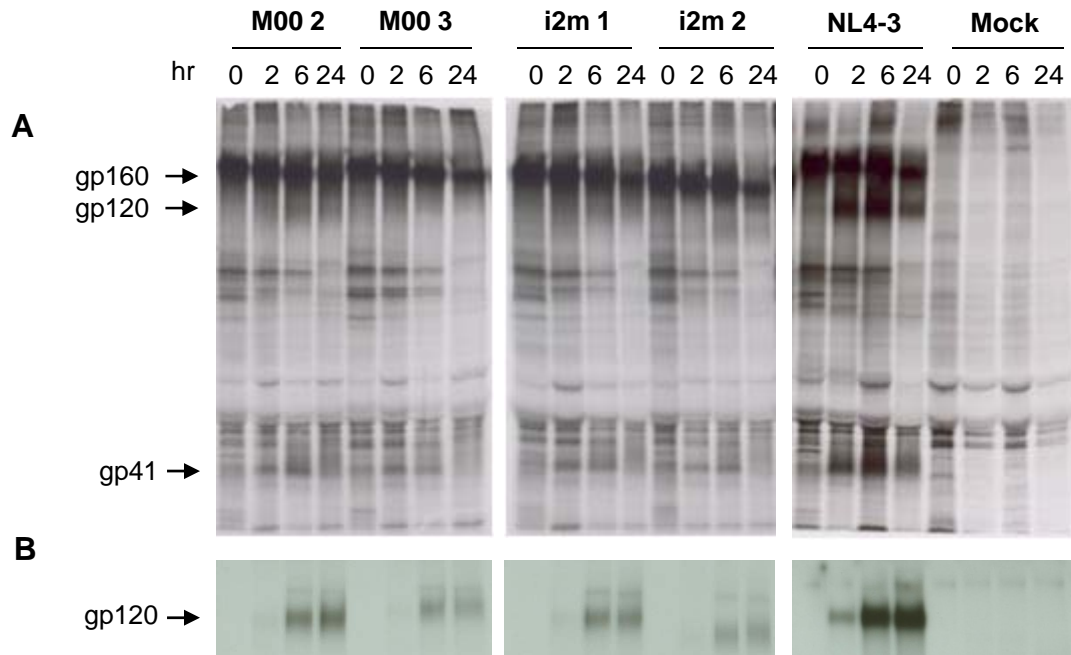

Supplement: NIHMS167687-supplement-01.pdf [file NIHMS167687-supplement-01.pdf]
